# Supplementary material
Source: PubMed Central journal article supplement (PMC3642775)
Supplement: NIHMS458582-supplement-01.pdf [file NIHMS458582-supplement-01.pdf]

eTable 1. Selected Characteristics of ARIC Participants at Visit 4 Stratified by Follow-Up Status.

|                                   | Died<br>(n=1,229) | Lost to Follow-<br>Up/Refused (n=663) | Complete Follow-Up<br>(n=7,507) |
|-----------------------------------|-------------------|---------------------------------------|---------------------------------|
| Age (years), mean (SD)            | 65.5 (5.4)        | 63.4 (5.5)                            | 62.1 (5.5)                      |
| Females, %                        | 40.1              | 41.6                                  | 60.9                            |
| Race                              |                   |                                       |                                 |
| African American, %               | 21.6              | 14.7                                  | 19.6                            |
| Caucasian, %                      | 78.4              | 85.3                                  | 80.4                            |
| * Hypertension, % (SE)            | 52.5 (6.3)        | 52.8 (8.1)                            | 43.2 (2.4)                      |
| * Diabetes, % (SE)                | 27.5 (6.9)        | 22.1 (9.6)                            | 14.9 (3.3)                      |
| * Cognitive Test Score at Visit 2 |                   |                                       |                                 |
| DWRT, mean (SE)                   | 6.64 (0.04)       | 6.65 (0.06)                           | 6.80 (0.02)                     |
| DSST, mean (SE)                   | 44.2 (0.3)        | 45.6 (0.4)                            | 47.5 (0.1)                      |
| WFT, mean (SE)                    | 33.4 (0.4)        | 33.6 (0.5)                            | 34.8 (0.2)                      |
| * Cognitive Test Score at Visit 4 |                   |                                       |                                 |
| DWRT, mean (SE)                   | 6.48 (0.04)       | 6.51 (0.06)                           | 6.71 (0.02)                     |
| DSST, mean (SE)                   | 41.4 (0.3)        | 42.8 (0.4)                            | 45.2 (0.1)                      |
| WFT, mean (SE)                    | 32.4 (0.4)        | 32.7 (0.5)                            | 34.4 (0.1)                      |

\* Age, gender, and race/center adjusted.

eTable 2. Adjusted\* Hazard Ratios (95% CI) for Incident Dementia Occurring ≥6.5 Years Post Visit 4 by Category of Word Fluency Test Score at Visits 2 and 4.

|                          |                              | Visit 2 Score                  |                                 |                                 |                                  |
|--------------------------|------------------------------|--------------------------------|---------------------------------|---------------------------------|----------------------------------|
|                          |                              | Category 1<br>(Score 38-99)    | Category 2<br>(Score 27-<38)    | Category 3<br>(Score 0-<27)     |                                  |
| <b>Visit 4<br/>Score</b> | Category 1<br>(Score 38-99)  | 1.00 (reference)<br>30 / 2,657 | 0.82 (0.36, 1.87)<br>7 / 769    | ---<br>0 / 65                   | 1.00 (reference)<br>37 / 3,491   |
|                          | Category 2<br>(Score 27-<38) | 1.21 (0.63, 2.32)<br>13 / 866  | 0.92 (0.51, 1.66)<br>19 / 1,615 | 1.62 (0.77, 3.41)<br>10 / 471   | 1.18 (0.75, 1.86)<br>42 / 2,952  |
|                          | Category 3<br>(Score 0-<27)  | 1.11 (0.26, 4.68)<br>2 / 119   | 1.33 (0.70, 2.52)<br>16 / 914   | 1.55 (0.90, 2.66)<br>45 / 1,923 | 1.53 (0.96, 2.44)<br>63 / 2,956  |
|                          |                              | 1.00 (reference)<br>45 / 3,642 | 0.94 (0.61, 1.45)<br>42 / 3,298 | 1.32 (0.83, 2.09)<br>55 / 2,459 | 1.42 (0.96, 2.09)<br>142 / 9,399 |

\* Model is adjusted for age (years), gender, race/center (Maryland whites; Minnesota whites; North Carolina whites; North Carolina blacks; Mississippi blacks), education (<high school; high school or equivalent; college or professional), income (<\$35,000/year; ≥\$35,000/year; unknown), diabetes, body mass index (kg/m<sup>2</sup>), cigarette smoking (current; former; never), alcohol consumption (current; former; never), total cholesterol (mg/dL), HDL cholesterol (mg/dL), hypertension, and APOE ε4 genotype (0, 1, or 2 ε4 alleles).

† p < 0.05

Legend: Data in bottom right corner of each cell represent number of events / number of participants in each group.
